# Supplementary material
Source: PubMed Central journal article supplement (PMC7330891)
Supplement: ao0c00912_si_001.pdf [file ao0c00912_si_001.pdf]

## Supporting information

### **Phytochemical Curcumin Co-formulated Silver-Decorated Melanin-like Polydopamine/Mesoporous Silica Composite with Improved Antibacterial and Chemotherapeutic Effect against Drug-resistant Cancer Cells**

Yiyan Song<sup>1#</sup>, Ling Cai<sup>1#</sup>, Zhongcheng Tian<sup>2</sup>, Yuan Wu<sup>3\*</sup>, Jin Chen<sup>1,4,5\*</sup>

<sup>1</sup>Center for Global Health, School of Public Health, Nanjing Medical University, Nanjing 211166, Jiangsu, China

<sup>2</sup>The TCM Hospital of Huaian, 223001 Huaian, China

<sup>3</sup>Department of Medical Oncology, Jiangsu Cancer Hospital, Jiangsu Institute of Cancer Research, The Affiliated Cancer Hospital of Nanjing Medical University, Nanjing 210009, China

<sup>4</sup>The Key Laboratory of Modern Toxicology, Ministry of Education, School of Public Health, Nanjing Medical University, Nanjing 211166, Jiangsu, China

<sup>5</sup>Key Laboratory of Antibody Technique of National Health Commission, Nanjing Medical University, Nanjing 211166, China

<sup>#</sup>Equal contribution.

\*Correspondence author. E-mail: J.C., okachen30@gmail.com; jchen@njmu.edu.cn; E-mail: W. Y., wu@njmu.edu.cn

**Table S1.** IC<sub>50</sub> values (μg/mL) and combination index (CI) of curcumin, Ag ions and CCM@SBA-15/PDA/Ag on HeLa and A549/TAX cells after 24 h-incubation

|          | Curcumin       | Ag ions        | CCM@SBA-15/PDA/Ag                                                | CI            |
|----------|----------------|----------------|------------------------------------------------------------------|---------------|
| HeLa     | 10.99<br>μg/mL | 0.643<br>μg/mL | 1.38 μg/mL<br>(containing CCM 0.026 μg/mL and<br>Ag 0.128 μg/mL) | 0.201<br>(<1) |
| A549/TAX | 39.52<br>μg/mL | 1.43 μg/mL     | 5.05 μg/mL<br>(containing CCM 0.095 μg/mL and<br>Ag 0.469 μg/mL) | 0.330<br>(<1) |

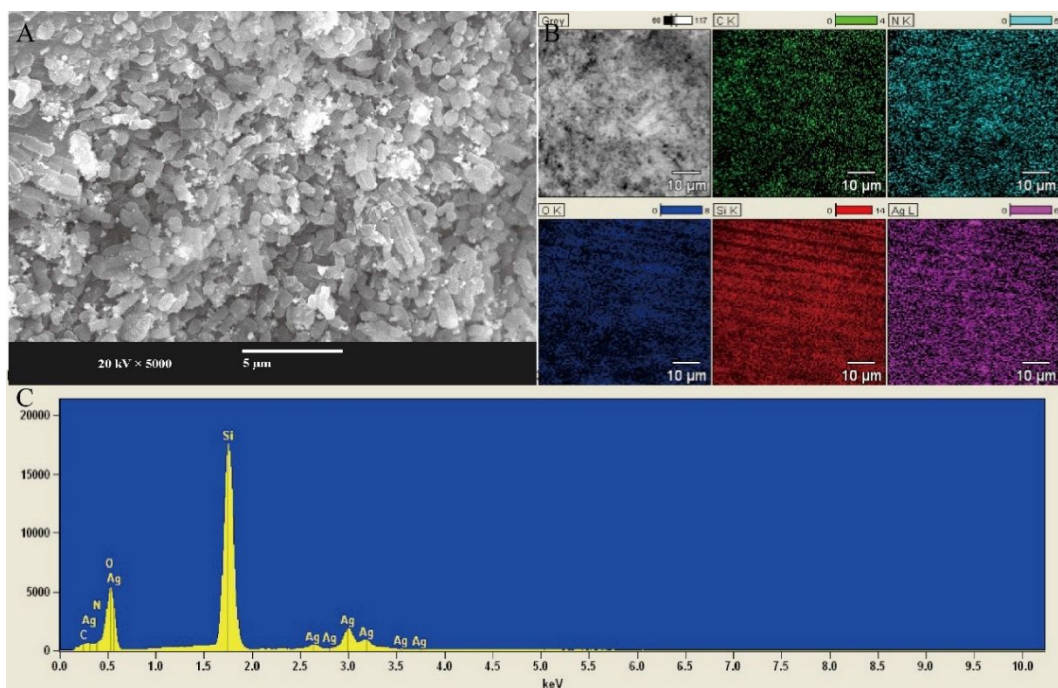

**Figure S1.** (A) SEM images of CCM@SBA-15/PDA/Ag composite, (B) corresponding EDS mapping results of C, N, O, Si and Ag elements and (C) X-ray energy dispersive spectrum.

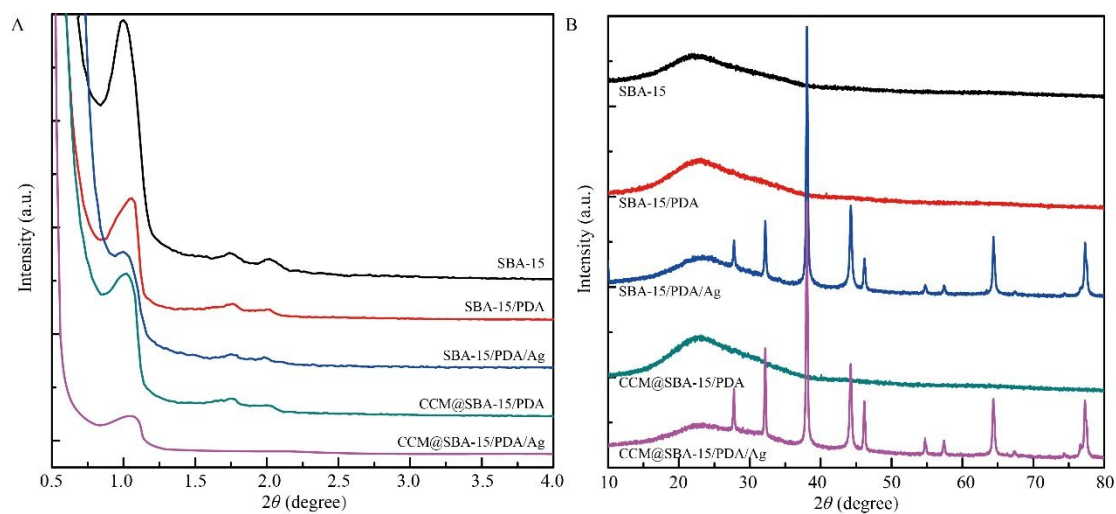

**Figure S2.** (A) Small and (B) wide angle X-ray diffraction patterns for SBA-15, SBA-15/PDA, SBA-15/PDA/Ag, CCM@SBA-15/PDA and CCM@SBA-15/PDA/Ag powders.

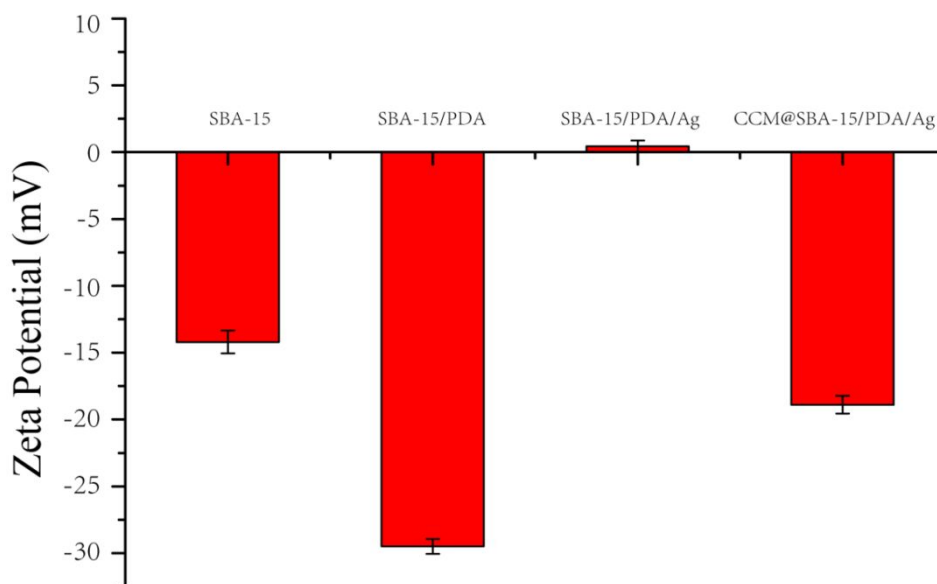

**Figure S3.** Zeta potentials of SBA-15, SBA-15/PDA, SBA-15/PDA/Ag and CCM@SBA-15/PDA/Ag composites.

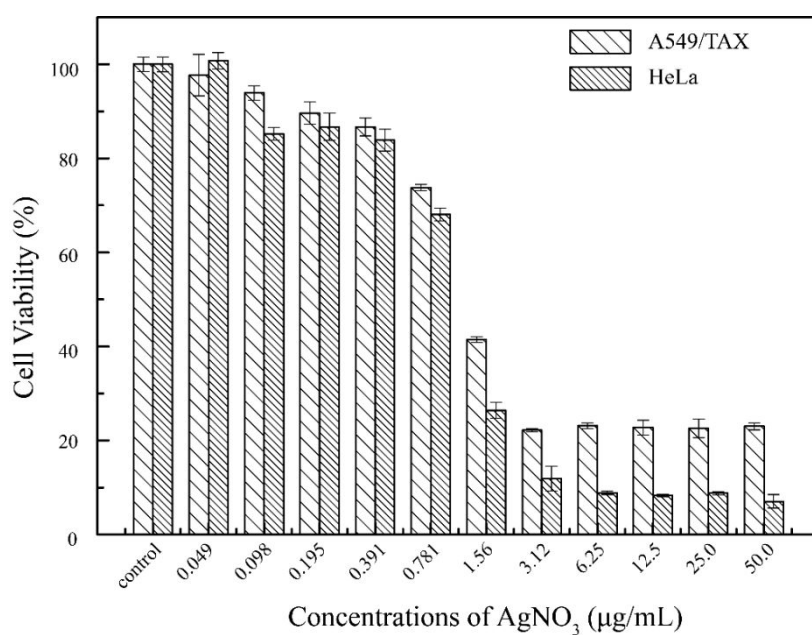

**Figure S4.** Cell viability of HeLa and A549/TAX cells incubated with different concentrations of AgNO<sub>3</sub>. Values were the average of three separate experiments in triplicate. Error bars represented standard deviations ( $n=3$ ).
